# Supplementary material
Source: PubMed Central journal article supplement (PMC9097543)
Supplement: NIHMS1785271-supplement-Supplementary_Tables.pdf [file NIHMS1785271-supplement-Supplementary_Tables.pdf]

| Case Number | Age | Gender | GAS | PMI (hr) | Mode of Death             | Figure |
|-------------|-----|--------|-----|----------|---------------------------|--------|
| Control 1   | 21  | Male   | 90  | 8        | Homicide - Stabbing       | 1,2    |
| Control 2   | 30  | Male   | 100 | 6        | MVA-driver (Accident)     | 1,2    |
| Control 3   | 31  | Male   | 82  | 10       | MVA-driver (Accident)     | 1,2    |
| Control 4   | 37  | Male   | 70  | 15       | Cardiovascular (natural)  | 1,2    |
| Control 5   | 39  | Male   | 90  | 14       | Cardiovascular (natural)  | 1,2    |
| Control 6   | 41  | Female | 85  | 15       | Gun Shot Wound (homicide) | 1      |
| Control 7   | 43  | Male   | 90  | 23       | Cardiovascular (natural)  | 1,2    |
| Control 8   | 51  | Female | 80  | 11       | Strangle (homicide)       | 1      |
| Control 9   | 56  | Female | 86  | 19       | MVA-pedestrian (accident) | 1      |

**Supplementary Data Table 1: Healthy control subject clinical data.** Control subjects belonged to an age group of 21-56 years, and had no neurologic or psychiatric diagnoses, no pathological or traumatic conditions affecting the brain, clear toxicology reports, and were free of psychiatric treatments and cognitive impairment. GAS: global assessment score of mental health, PMI: post-mortem interval, MVA: motor vehicle accident.

| Case Number | Disease Duration (yr.) | Age at surgery (yr.) | Age of onset (yr.) | Gender | Side  | MEA activity in DG (Fig 4, 5) | Regions with Inter-ictal activity | Applications               | Figure    |
|-------------|------------------------|----------------------|--------------------|--------|-------|-------------------------------|-----------------------------------|----------------------------|-----------|
| MTLE 1      | 3                      | 28                   | 25                 | male   | right | Whole DG NI                   | N.D                               | IHC, <i>in vitro</i> , MEA | 1,2,3,4,5 |
| MTLE 2      | 3                      | 31                   | 28                 | female | right |                               |                                   | IHC                        | 1,2,4     |
| MTLE 3      | 7                      | 20                   | 13                 | female | right |                               |                                   | IHC                        | 1,2,4     |
| MTLE 4      | 7                      | 37                   | 30                 | female | left  | Whole DG NI                   | CA, Subiculum                     | IHC, <i>in vitro</i> , MEA | 1,2,3,4,5 |
| MTLE 5      | 7                      | 56                   | 49                 | female | right |                               |                                   | IHC                        | 1,2       |
| MTLE 6      | 8                      | 38                   | 30                 | male   | left  | Whole DG NI                   | N.D                               | IHC, MEA                   | 1,2,4,5   |
| MTLE 7      | 17                     | 30                   | 13                 | male   | right |                               |                                   | <i>in vitro</i>            | 3         |
| MTLE 8      | 18                     | 43                   | 25                 | female | left  | DG-I                          | DG, CA                            | IHC, <i>in vitro</i> , MEA | 1,2,3,4,5 |
| MTLE 9      | 19                     | 29                   | 10                 | male   | right | Whole DG NI                   | N.D                               | IHC, <i>in vitro</i>       | 1,2,3,4   |
| MTLE 10     | 21                     | 38                   | 17                 | female | left  | DG-I                          | DG, Subiculum                     | IHC, MEA                   | 1,2,4,5   |
| MTLE 11     | 26                     | 54                   | 28                 | female | right | Whole DG NI                   | CA, Subiculum                     | IHC, <i>in vitro</i> , MEA | 1,2,3,4,5 |
| MTLE 12     | 27                     | 39                   | 12                 | male   | right | Whole DG NI                   | Subiculum                         | IHC, MEA                   | 1,2,4,5   |
| MTLE 13     | 29                     | 41                   | 12                 | female | left  | DG-I                          | DG, Subiculum                     | IHC, MEA                   | 1,2,4,5   |
| MTLE 14     | 31                     | 39                   | 8                  | male   | right |                               |                                   | IHC                        | 1,2       |
| MTLE 15     | 36                     | 50                   | 14                 | female | right |                               |                                   | <i>in vitro</i>            | 3         |
| MTLE 16     | 38                     | 45                   | 7                  | female | right | DG-I                          | DG, CA                            | IHC, MEA                   | 1,2,4,5   |
| MTLE 17     | 42                     | 48                   | 6                  | female | left  | DG-I                          | DG, Subiculum                     | IHC, MEA                   | 1,2,4,5   |
| MTLE 18     | 52                     | 53                   | 1                  | male   | left  | Whole DG NI                   | N.D                               | IHC, MEA                   | 1,2,4,5   |
| MTLE 19     | 53                     | 56                   | 3                  | female | right |                               |                                   | IHC                        | 1,2       |

**Supplementary Data Table 2: Mesial temporal lobe epilepsy (MTLE) patient clinical data.** Patients belonged to an age group of 20-56 years, with disease duration of 3-53 years, and presented lateralized seizure activity. Multi-electrode arrays (MEA) performed on hippocampal surgical resections localized activity to either the dentate gyrus (DG-I), or CA (Cornu Ammonis regions 1-3) and subiculum structures outside the dentate gyrus (Whole DG-III). Hippocampal tissue was additionally processed for immunohistochemistry (IHC) and primary cell culture (*in vitro*) experiments presented in figures as denoted. N.D: Not detected.

| <b>Primary Antibodies</b>    |                |                                  |                        |                    |
|------------------------------|----------------|----------------------------------|------------------------|--------------------|
| <b>Antibodies</b>            | <b>Species</b> | <b>Dilution</b>                  | <b>Company</b>         | <b>Catalog No:</b> |
| Arc                          | Rabbit         | 1 in 100 (IHC)                   | Proteintech            | 16290-1-AP         |
| Doublecortin (Dcx)           | Mouse          | 3 in 100 (IHC)                   | Santa Cruz             | sc-390645          |
| c-Fos                        | Rabbit         | 1 in 100 (IHC)                   | CST                    | #2250              |
| Ki-67                        | Rabbit         | 1 in 200 (IHC)                   | Abcam                  | Ab15580            |
| Gad 65+67                    | Rabbit         | 1 in 100 (IHC)                   | Abcam                  | ab11070            |
| GFAP                         | Rabbit         | 1 in 2000 (IHC)                  | Millipore              | AB5804             |
| GFAP                         | Rabbit         | 1 in 200 (IHC)                   | DAKO                   | Z0334              |
|                              |                | 1 in 1000 (IF)                   | DAKO                   | Z0334              |
| Glut Receptor 2/3            | Rabbit         | 1 in 200 (IHC)                   | Millipore              | AB1506             |
| Iba 1                        | Rabbit         | 1 in 200 (IHC)                   | Wako                   | #019-19741         |
| Prox1                        | Rabbit         | 1 in 200 (IHC)                   | Abcam                  | ab101851           |
|                              |                | 1 in 500 (IF)                    | Abcam                  | ab101851           |
| Prox1                        | Mouse          | 1 in 100 (IHC)                   | Millipore              | MAB5654            |
| PSA-NCAM                     | Mouse          | 1 in 200 (IHC)                   | Millipore              | MAB5324            |
| S100 $\beta$                 | Goat           | 1 in 50 (IHC)                    | R & D Systems          | AF1820             |
| Tuj1 ( $\beta$ -III Tubulin) | Mouse          | 1 in 1000 (IF)                   | Biolegend              | #801201            |
| <b>Secondary Antibodies</b>  |                |                                  |                        |                    |
| <b>Antibodies</b>            | <b>Species</b> | <b>Dilution</b>                  | <b>Company</b>         | <b>Catalog No:</b> |
| Anti-mouse Alexa Fluor 488   | Donkey         | 1 in 200 (IHC),<br>1 in 500 (IF) | Jackson Immunoresearch | 715-546-151        |
| Anti-rabbit Alexa Fluor 488  | Donkey         | 1 in 200 (IHC)                   | Jackson Immunoresearch | 711-546-152        |
| Anti-goat Alexa Fluor 488    | Donkey         | 1 in 200 (IHC)                   | Jackson Immunoresearch | 705-546-147        |
| Anti-mouse Cy3               | Donkey         | 1 in 200 (IHC)                   | Jackson Immunoresearch | 715-166-150        |
| Anti-rabbit Cy3              | Donkey         | 1 in 200 (IHC),<br>1 in 500 (IF) | Jackson Immunoresearch | 711-166-152        |
| Anti-goat Cy3                | Donkey         | 1 in 200 (IHC)                   | Jackson Immunoresearch | 705-166-147        |
| Anti-mouse IgM Cy3           | Goat           | 1 in 200 (IHC)                   | Jackson Immunoresearch | 115-165-075        |
| Anti-rabbit Alexa Fluor 647  | Donkey         | 1 in 200 (IHC)                   | Jackson Immunoresearch | 711-606-152        |
| Anti-goat Alexa Fluor 647    | Donkey         | 1 in 200 (IHC)                   | Jackson Immunoresearch | 705-606-147        |

**Supplementary Data Table 3: Antibodies used in this study.** IHC: Immunohistochemistry on tissue. IF: Immunofluorescence on cell culture.

|                             | $R^2$ | RMSE  |
|-----------------------------|-------|-------|
| Linear                      | 0.561 | 353.9 |
| Logarithmic decay           | 0.706 | 281.1 |
| Exponential one-phase decay | 0.755 | 264.2 |

**Supplementary Data Table 4: Parameter fits for regression analyses.** A comparison of fits between linear regression, logarithmic, and exponential one phase decay was performed in Figure 1h.  $R^2$ : Coefficient of determination. RMSE: root-mean square error.
